# Supplementary material for: Effect of Stability of Two-Dimensional (2D) Aminoethyl Methacrylate Perovskite Using Lead-Based Materials for Ammonia Gas Sensor Application
Source: MDPI journal article supplement (doi:10.3390/polym14091853), 2022-04-30
Supplement: s1 [file s1]

# Supplementary Materials: Effect of Stability of Two-Dimensional (2D) Aminoethyl Methacrylate Perovskite Using Lead-Based Materials for Ammonia Gas Sensor Application

Muhamad Yuzaini Azrai Mat Yunin, Norfatimah Mohd Adenam, Wan M. Khairul, Abdul Hafidz Yusoff and Hasyiya Karimah Adli

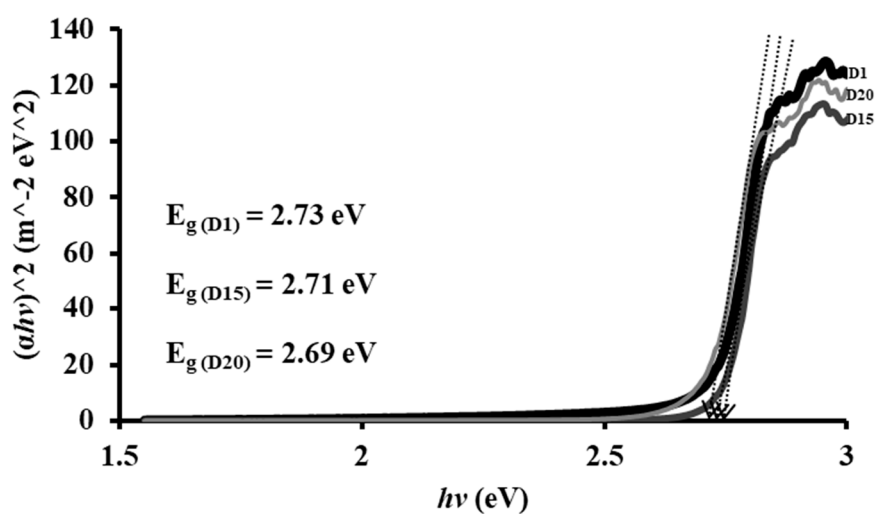

Figure S1. Tauc plot of I-AMP at D1, D15 and D20, respectively.

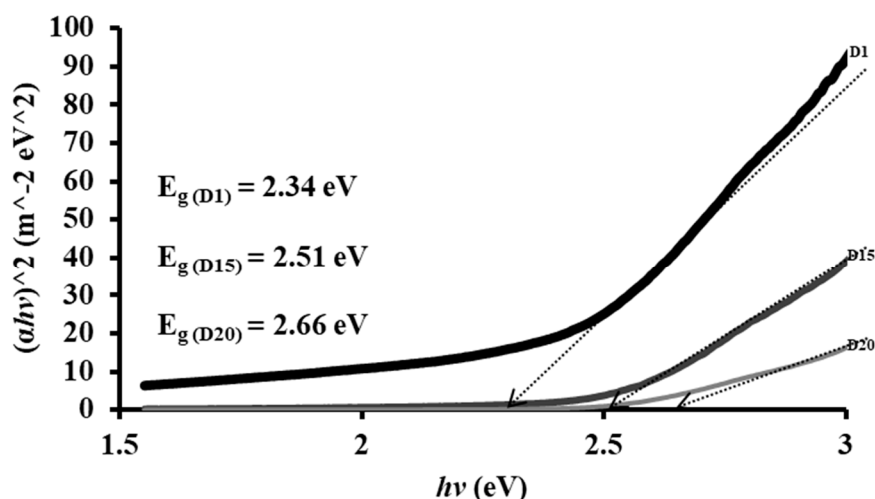

Figure S2. Tauc plot of N-AMP at D1, D15 and D20, respectively.

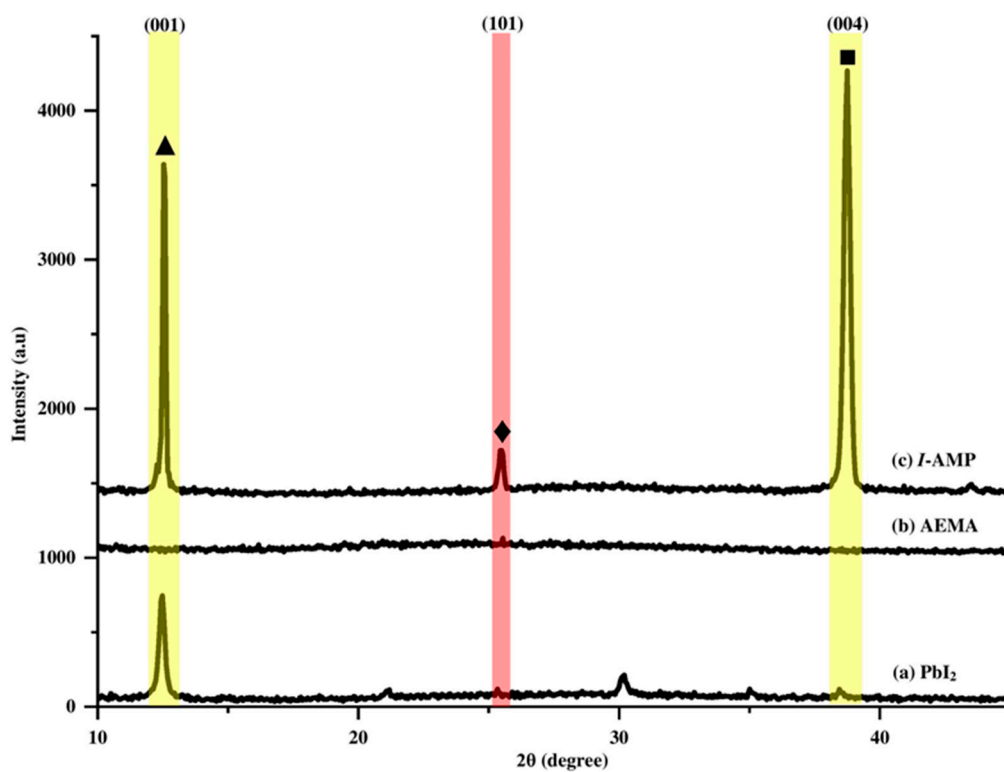

Figure S3. XRD spectrum of I-AMP with starting material in which  $\blacktriangle$ ,  $\blacklozenge$  and  $\blacksquare$  marked, represent to  $\text{PbI}_2$ , perovskite and  $\text{TiO}_2$  peaks, respectively.

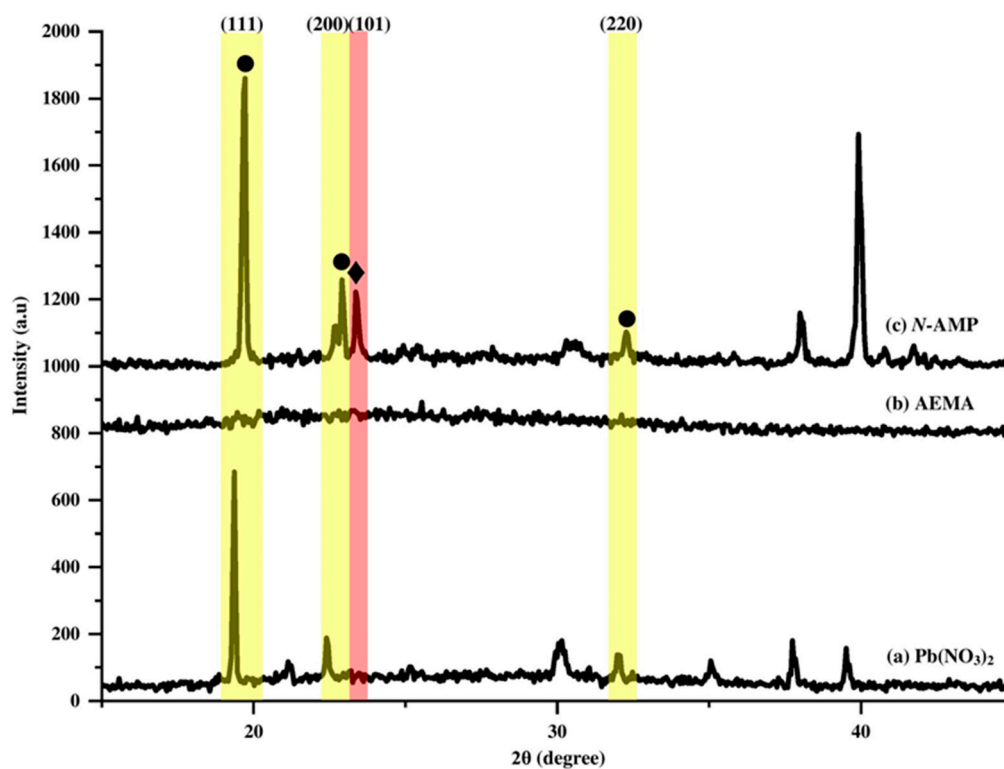

Figure S4. XRD spectrum of N-AMP with starting material in which  $\bullet$  and  $\blacklozenge$  marked, represent to  $\text{Pb}(\text{NO}_3)_2$  and perovskite peaks, respectively.

**Table S1.** Structural parameters of *I*-AMP and *N*-AMP.

| Samples       | Day | Storage<br>Conditions | Angle<br>(2 $\theta$ ) | FHWM  | Crystallite size,<br>D (nm) | Crystallinity<br>(%) | Lattice<br>Strain (%) |
|---------------|-----|-----------------------|------------------------|-------|-----------------------------|----------------------|-----------------------|
| <i>I</i> -AMP | D1  | RT                    | 25.35                  | 0.28  | 29.49                       | 63.57                | 0.12                  |
|               |     | S                     | 29.44                  | 6.44  | 1.27                        | 38.35                | 2.72                  |
|               |     | V                     | 29.71                  | 6.40  | 1.28                        | 24.84                | 2.70                  |
|               | D15 | RT                    | 25.47                  | 0.34  | 23.90                       | 55.21                | 0.15                  |
|               |     | S                     | 29.46                  | 7.33  | 1.12                        | 32.16                | 3.09                  |
|               |     | V                     | 28.96                  | 6.54  | 1.25                        | 22.80                | 2.76                  |
|               | D20 | RT                    | 25.37                  | 0.36  | 22.54                       | 40.50                | 0.15                  |
|               |     | S                     | 29.54                  | 10.03 | 0.82                        | 26.77                | 4.23                  |
|               |     | V                     | 29.81                  | 8.65  | 0.95                        | 19.31                | 3.65                  |
| <i>N</i> -AMP | D1  | RT                    | 23.17                  | 0.24  | 33.12                       | 59.72                | 0.10                  |
|               |     | S                     | 23.23                  | 0.21  | 38.85                       | 82.29                | 0.09                  |
|               |     | V                     | 23.19                  | 0.19  | 42.29                       | 66.90                | 0.08                  |
|               | D15 | RT                    | 23.16                  | 0.19  | 41.71                       | 61.09                | 0.08                  |
|               |     | S                     | 22.70                  | 0.20  | 40.12                       | 86.76                | 0.09                  |
|               |     | V                     | 22.71                  | 0.17  | 46.74                       | 81.58                | 0.07                  |
|               | D20 | RT                    | 23.20                  | 0.17  | 47.24                       | 86.49                | 0.07                  |
|               |     | S                     | 23.17                  | 0.14  | 57.64                       | 96.76                | 0.06                  |
|               |     | V                     | 23.16                  | 0.16  | 50.95                       | 84.72                | 0.07                  |

**Table S2.** Structural parameters of *I*-AMP and *N*-AMP in exposure of ammonia gas.

| Samples       | Conditions | Angle<br>(2 $\theta$ ) | FHWM | Crystallite size, D<br>(nm) | Crystallinity (%) | Lattice<br>Strain (%) |
|---------------|------------|------------------------|------|-----------------------------|-------------------|-----------------------|
| <i>I</i> -AMP | Before     | 25.35                  | 0.28 | 29.49                       | 63.57             | 0.12                  |
|               | After      | 26.75                  | 8.02 | 1.02                        | 16.02             | 3.41                  |
| <i>N</i> -AMP | Before     | 23.17                  | 0.24 | 33.12                       | 59.72             | 0.10                  |
|               | After      | 23.15                  | 0.13 | 63.21                       | 93.31             | 0.06                  |
